# Supplementary material for: Theoretical investigation of polymorph- and coformer-dependent photoluminescence in molecular crystals
Source: Royal Society of Chemistry journal article supplement (doi:10.1039/d1ce00383f), 2021-01-01

## Electronic Supplementary Information: Theoretical investigation of polymorph- and coformer-dependent photoluminescence in molecular crystals

Xibo Feng,<sup>1, a)</sup> Axel D. Becke,<sup>1, b)</sup> and Erin R. Johnson<sup>1, c)</sup>

*Department of Chemistry, Dalhousie University, 6274 Coburg Road, P.O. Box 15000, Halifax, Nova Scotia B3H 4R2, Canada*

(Dated: 15 April 2021)

TABLE I: Absorption of the 8 ROY polymorphs: calculated triplet-excitation energies for the crystal ( $\Delta E_{0T}^{\text{cryst}}$ ) and the excised 9-ACA molecule ( $\Delta E_{0T}^{\text{mol}}$ ), along with the molecular singlet-triplet splittings ( $\Delta E_{ST}^{\text{mol}}$ ). All values are in eV.

| Species     | $\Delta E_{0T}^{\text{cryst}}$ | $\Delta E_{0T}^{\text{mol}}$ | $\Delta E_{ST}^{\text{mol}}$ |
|-------------|--------------------------------|------------------------------|------------------------------|
| <b>R</b>    | 1.52                           | 2.66                         | 0.74                         |
| <b>R05</b>  | 1.40                           | 2.61                         | 0.77                         |
| <b>ORP</b>  | 1.44                           | 2.62                         | 0.76                         |
| <b>OP</b>   | 1.55                           | 2.76                         | 0.81                         |
| <b>ON</b>   | 1.50                           | 2.52                         | 0.78                         |
| <b>YN</b>   | 1.92                           | 2.90                         | 0.99                         |
| <b>Y</b>    | 1.92                           | 2.97                         | 0.96                         |
| <b>YT04</b> | 1.84                           | 2.93                         | 0.96                         |

TABLE II: Emission of 9-ACA (**A**) and its cocrystals (**A·B–A·E**): calculated triplet-excitation energies for the crystal ( $\Delta E_{0T}^{\text{cryst}}$ ) and the excised 9-ACA molecule ( $\Delta E_{0T}^{\text{mol}}$ ), along with the molecular singlet-triplet splittings ( $\Delta E_{ST}^{\text{mol}}$ ). All values are in eV.

| Species    | $\Delta E_{0T}^{\text{cryst}}$ | $\Delta E_{0T}^{\text{mol}}$ | $\Delta E_{ST}^{\text{mol}}$ |
|------------|--------------------------------|------------------------------|------------------------------|
| <b>A</b>   | 1.47                           | 1.62                         | 1.59                         |
| <b>A·B</b> | 1.38                           | 1.57                         | 1.58                         |
| <b>A·C</b> | 1.39                           | 2.07                         | 1.43                         |
| <b>A·D</b> | 1.48                           | 1.59                         | 1.60                         |
| <b>A·E</b> | 1.01                           | 2.07                         | 1.44                         |

TABLE III: Band structures of the 8 ROY polymorphs: calculated valence band edges (maximum,  $E_{\text{val}}^{\text{max}}$ ) and conduction band edges (minimum,  $E_{\text{cond}}^{\text{min}}$ ), along with the corresponding valence-conduction band gaps ( $\Delta E_{\text{BG}}$ ). All values are in eV.

| Species     | $E_{\text{val}}^{\text{max}}$ | $E_{\text{cond}}^{\text{min}}$ | $\Delta E_{\text{BG}}$ |
|-------------|-------------------------------|--------------------------------|------------------------|
| <b>R</b>    | 2.12                          | 3.24                           | 1.12                   |
| <b>R05</b>  | 0.95                          | 2.21                           | 1.25                   |
| <b>ORP</b>  | 1.92                          | 3.28                           | 1.37                   |
| <b>OP</b>   | 1.96                          | 3.34                           | 1.38                   |
| <b>ON</b>   | 2.02                          | 3.32                           | 1.30                   |
| <b>YN</b>   | 1.68                          | 3.30                           | 1.62                   |
| <b>Y</b>    | 1.73                          | 3.57                           | 1.84                   |
| <b>YT04</b> | 1.86                          | 3.53                           | 1.67                   |

<sup>a)</sup>Electronic mail: frederick.hillsfeng@dal.ca

<sup>b)</sup>Electronic mail: axel.becke@dal.ca

<sup>c)</sup>Electronic mail: erin.johnson@dal.ca; <http://schooner.chem.dal.ca>

TABLE IV: Band structures of 9-ACA (**A**) and its cocrystals (**A·B**–**A·E**): calculated valence band edges (maximum,  $E_{\text{val}}^{\text{max}}$ ) and conduction band edges (minimum,  $E_{\text{cond}}^{\text{min}}$ ), along with the corresponding valence-conduction band gaps ( $\Delta E_{\text{BG}}$ ). All values are in eV.

| Species    | $E_{\text{val}}^{\text{max}}$ | $E_{\text{cond}}^{\text{min}}$ | $\Delta E_{\text{BG}}$ |
|------------|-------------------------------|--------------------------------|------------------------|
| <b>A</b>   | 1.78                          | 3.52                           | 1.74                   |
| <b>A·B</b> | 2.03                          | 3.68                           | 1.65                   |
| <b>A·C</b> | 1.83                          | 3.41                           | 1.58                   |
| <b>A·D</b> | 1.98                          | 3.79                           | 1.81                   |
| <b>A·E</b> | 1.62                          | 2.42                           | 0.80                   |

TABLE V: The ROY molecule: calculated values of molecular triplet-excitation energies ( $\Delta E_{\text{0T}}^{\text{mol}}$ ) and molecular  $S_1$ - $T_1$  splittings ( $H_{12}$ ), across the 0-180° range of  $\theta_{\text{thio}}$ .

| $\theta_{\text{thio}}$ (°) | $\Delta E_{\text{0T}}^{\text{mol}}$ (eV) | $H_{12}$ (eV) |
|----------------------------|------------------------------------------|---------------|
| 0                          | 3.69                                     | 0.68          |
| 10                         | 3.73                                     | 0.65          |
| 20                         | 3.78                                     | 0.68          |
| 30                         | 3.85                                     | 0.73          |
| 40                         | 3.95                                     | 0.79          |
| 50                         | 4.06                                     | 0.85          |
| 60                         | 4.17                                     | 0.92          |
| 70                         | 4.26                                     | 0.98          |
| 80                         | 4.31                                     | 1.01          |
| 90                         | 4.33                                     | 1.02          |
| 100                        | 4.30                                     | 1.01          |
| 110                        | 4.24                                     | 0.97          |
| 120                        | 4.16                                     | 0.93          |
| 130                        | 4.08                                     | 0.89          |
| 140                        | 4.00                                     | 0.84          |
| 150                        | 3.93                                     | 0.79          |
| 160                        | 3.87                                     | 0.73          |
| 170                        | 3.83                                     | 0.68          |
| 180                        | 3.80                                     | 0.62          |

TABLE VI: ROY polymorphs: internal rotation angles (in degrees) calculated using fixed-cell ( $\theta_{\text{thio}}^{\text{fc}}$ ) and variable-cell optimization ( $\theta_{\text{thio}}^{\text{vc}}$ ) of the ground-state crystal geometries, compared to experiment ( $\theta_{\text{thio}}^{\text{exp}}$ ). The mean absolute percent errors (MAPE's) are also given.

| Species | $\theta_{\text{thio}}^{\text{exp}}$ | $\theta_{\text{thio}}^{\text{fc}}$ | $\theta_{\text{thio}}^{\text{vc}}$ |
|---------|-------------------------------------|------------------------------------|------------------------------------|
| R       | 21.7                                | 22.1                               | 19.8                               |
| R05     | 34.0/44.9                           | 42.5                               | 23.3                               |
| ORP     | 39.4                                | 36.4                               | 29.0                               |
| OP      | 46.1                                | 43.1                               | 37.7                               |
| ON      | 52.6                                | 50.5                               | 42.2                               |
| YN      | 104.1                               | 106.2                              | 113.0                              |
| Y       | 104.7                               | 106.4                              | 112.0                              |
| YT04    | 112.8                               | 114.4                              | 119.9                              |
| MAPE    | -                                   | 3.8%                               | 15.8%                              |

TABLE VII: 9-ACA (**A**) and its cocrystals (**A·B**–**A·E**): the amounts of absolute charge per 9-ACA molecule ( $e^-$ ) in  $S_0$  and  $T_1$ .

| Species    | $S_0$ | $T_1$ |
|------------|-------|-------|
| <b>A</b>   | 0.001 | 0.001 |
| <b>A·B</b> | 0.05  | 0.06  |
| <b>A·C</b> | 0.13  | 0.12  |
| <b>A·D</b> | 0.11  | 0.11  |
| <b>A·E</b> | 0.08  | 0.28  |

FIG. 1: The ROY molecule: calculated molecular singlet-excitation energies ( $\Delta E_{0S}^{\text{mol,rel.}}$ ), molecular  $S_1$ - $T_1$  splitting ( $H_{12}^{\text{rel.}}$ ), and  $S_0$  and  $T_1$  energies ( $E_{S_0/T_1}^{\text{rel.}}$ ), across the 0-180° range of  $\theta_{\text{thio}}$ , all relative to their respective values at  $\theta_{\text{thio}} = 0^\circ$ .

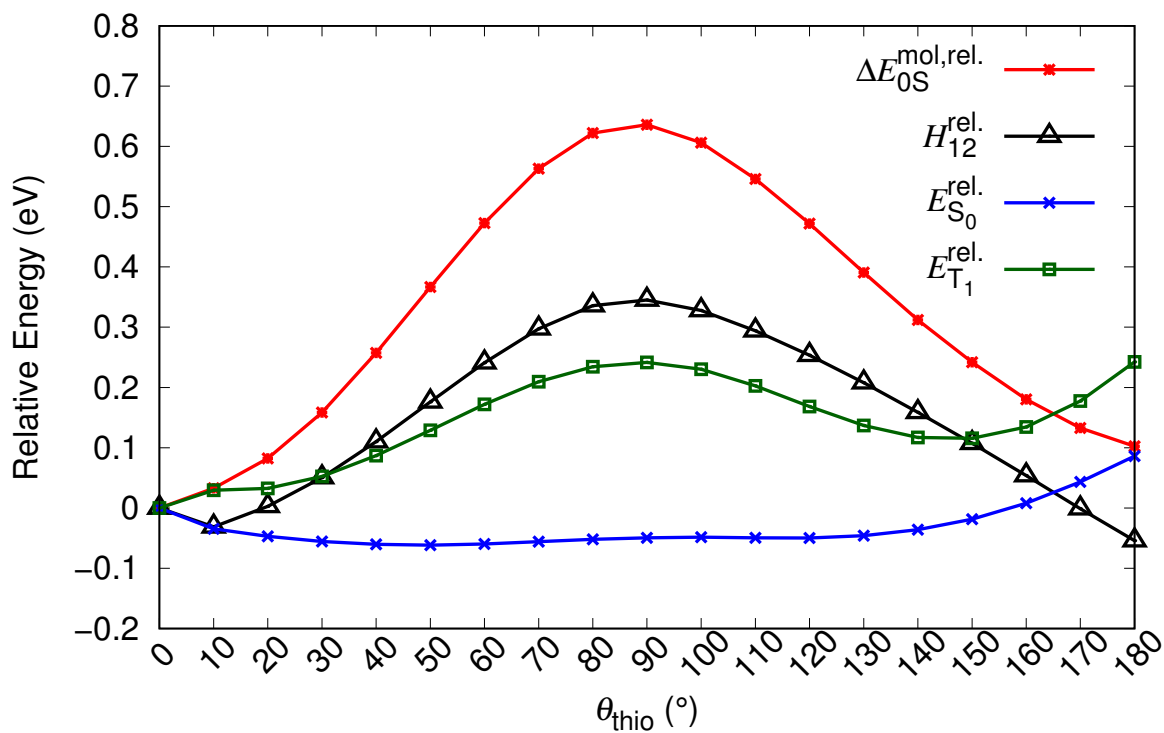

Supplement: d1ce00383f1.pdf [file d1ce00383f1.pdf]
